# Supplementary material for: Aqueous Extract of Black Maca Prevents Metabolism Disorder via Regulating the Glycolysis/Gluconeogenesis-TCA Cycle and PPARα Signaling Activation in Golden Hamsters Fed a High-Fat, High-Fructose Diet
Source: Front Pharmacol. 2018 Apr 6;9:333. doi: 10.3389/fphar.2018.00333 (PMC5897445; doi:10.3389/fphar.2018.00333)
Supplement: TABLE S2 — Major compound-target-disease table for maca. [file Table_2.XLSX]

## Sheet: Sheet6
Compound ID	Type	Prediction Method	Predicted Target (UniProtAC_Name)	Disease
A14	Amide alkaloid	Structure-based methods	P09467_FBP1	Diabetes Mellitus Type 2
A1	Amide alkaloid	Pharmacophore-based methods
A12	Amide alkaloid
A21	Imidazole alkaloids
A16	Imidazole alkaloids
A17	Amide alkaloid
J9	Glucosinolates
J10	Glucosinolates	Structure-based methods	P13866_SC5A1	Diabetes
J11	Glucosinolates
J12	Glucosinolates
J14	Glucosinolates
J12	Glucosinolates	Pharmacophore-based methods	P15121_ALDR	Diabetes Mellitus Type 2;Diabetic retinopathy;Diabetic neuropathy;Diabetic complications
J13	Glucosinolates
J14	Glucosinolates
J15	Glucosinolates
J16	Glucosinolates
J3	Glucosinolates
J4	Glucosinolates
A14	Amide alkaloid	Structure-based methods	P18031_PTN1	Obesity;Diabetes Mellitus Type 2
A15	Amide alkaloid
A24	Amide alkaloid
A6	Amide alkaloid
A8	Amide alkaloid
J10	Glucosinolates	Pharmacophore-based methods
J9	Glucosinolates	Structure-based methods	P24752_THIL	Hypercholesterolemia
S1	Sterol
S2	Sterol
S4	Sterol
S7	Sterol
J15	Glucosinolates	Pharmacophore-based methods	P27487_DPP4	Obesity;Diabetes Mellitus Type 2
J16	Glucosinolates
J4	Glucosinolates	Pharmacophore-based methods	P28845_DHI1	Obesity;Diabetes Mellitus Type 2
J9	Glucosinolates
J14	Glucosinolates	Structure-based methods	P31639_SC5A2	Obesity;Hyperinsulinemia;Hyperglycemia;Diabetes Mellitus Type 2
J3	Glucosinolates
J4	Glucosinolates
J9	Glucosinolates
A10	Amide alkaloid	Pharmacophore-based methods	P37231_PPARγ	Obesity;Insulin resistance;Diabetes mellitus
A11	Amide alkaloid
A14	Amide alkaloid
A15	Amide alkaloid
A16	Imidazole alkaloids
A24	Amide alkaloid
A25	Amide alkaloid
A25	Amide alkaloid	Pharmacophore-based methods	P48449_ERG7	Hypercholesterolemia
A7	Amide alkaloid
A3	Amide alkaloid	Structure-based methods	P49841_GSK3B	Diabetes Mellitus Type 2
A7	Amide alkaloid
A10	Amide alkaloid
A12	Amide alkaloid
A23	Amide alkaloid
A27	Amide alkaloid
A13	Amide alkaloid	Pharmacophore-based methods
A24	Amide alkaloid
J4	Glucosinolates	Structure-based methods
J13	Glucosinolates	Pharmacophore-based methods
A24	Amide alkaloid	Pharmacophore-based methods	P55055_LXRβ	Dyslipidemia
S7	Sterol
J10	Glucosinolates	Pharmacophore-based methods	Q16539_MK14	Insulin resistance
J4	Glucosinolates
J9	Glucosinolates
S7	Sterol
A13	Amide alkaloid	Structure-based methods	Q96RI1_FXR	Hypercholesterolemia
A13	Amide alkaloid	Structure-based methods	Q07869_PPARα	Obesity;Insulin resistance;Hyperinsulinemia;Hyperglycemia
A14	Amide alkaloid
J11	Glucosinolates	Pharmacophore-based methods	P23141_EST1	Hypercholesterolaemia
